# Supplementary material
Source: publisher site journal article supplement (https://www.dovepress.com/article/265797)
Supplement: Supplementary file 1 [file get_supplementary_file.php]

**Supplementary materials**

Table S1 supplementary: Description of study participants overall and by subgroups

|  | **Total:**  **N = 173** | **Control group:**  **N = 99** | **Poor Evolution:**  **N = 74** | **p** |
| --- | --- | --- | --- | --- |
| Age (years), median (IQR) | 74.0 (67 – 79) | 69 (65 – 77) | 78 (73 – 81) | < 0.0001 |
| Height (meter), median (IQR) | 1.7 (1.63 – 1.72) | 1.70 (1.65-1.74) | 1.67 (1.60 – 1.70) | 0.001 |
| BMI (kg/m2), median (IQR) | 25.9 (23.5 – 28) | 26.2 (24.2 – 28.4) | 25.6 (23 – 27.5) | 0.79 |
| Male gender, % (n) | 72.3 (125) | 84.8 (84) | 55.4 (41) | < 0.0001 |
| Chronic hypertension, % (n) | 67.6 (117) | 64.6 (64) | 71.6 (53) | 0.33 |
| Diabetic, % (n) | 23.1 (40) | 17.1 (17) | 31.1 (23) | 0.03 |
| Chronic renal failure, % (n) | 24.3 (42) | 13.1 (13) | 39.2 (29) | < 0.0001 |
| History of stroke, % (n) | 23.1 (40) | 29.2 (29) | 14.9 (11) | 0.39 |
| Ischemic heart disease, % (n) | 61.3 (106) | 70.7 (70) | 48.6 (36) | 0.003 |
| Valvular disease, % (n) | 69.9 (121) | 64.6 (64) | 77 (57) | 0.08 |
| Preoperative atrial fibrillation, % (n) | 26 (45) | 22.2 (22) | 31.1 (23) | 0.19 |
| Left ventricular function (%), median (IQR) | 55 (45 – 61) | 55 (45 – 65) | 55 (49 – 62) | 0.42 |
| Previous cardiac surgery, % (n) | 6.9 (12) | 7.1 (7) | 6.7 (5) | 0.96 |
| Euroscore II, median (IQR) | 2.3 (1.4 – 3.35) | 1.7 (1.2 – 2.9) | 2.7 (2.1 – 3.8) |  |
| **Type of surgery, % (n)** |  |  |  | 0.18 |
| Valve replacement | 37.2 (65) | 32.3 (32) | 44.6 (33) |  |
| Coronary artery bypass graft (CABG) | 27.3 (47) | 33.3 (33) | 18.9 (14) |  |
| Valve replacement with CABG | 26.7 (46) | 24.2 (24) | 29.7 (22) |  |
| Aortic and mitral valve replacement | 6.4 (11) | 8.1 (8) | 4.1 (3) |  |
| Others | 2.3 (4) | 2 (2) | 2.7 (2) |  |
| **Surgery and postoperative care** |  |  |  |  |
| CPB time (min), median (IQR) | 75 (59 – 100) | 79 (62 – 100) | 72 (54.5 – 99) | 0.42 |
| SAPS II, median (IQR) | 29 (25 – 33) | 27 (25 – 31) | 31 (27.5 – 35) | 0.014 |
| ICU hospitalization (day), median (IQR) | 2 (2 – 3) | 2 (2 – 3) | 2 (2 – 4) | 0.17 |
| Intubation (time in hours), median (IQR) | 5 (4 – 6) | 5 (4 – 5.5) | 5 (4 – 7) | 0.18 |
| Troponin (ng/l), median (IQR) | 507 (331 – 858) | 467 (305 – 759) | 550 (386 – 1,002) | 0.2 |
| Acute renal failure, % (n) | 14.5 (25) | 12.1 (12) | 17.6 (13) | 0.0001 |
| Revision surgery, % (n) | 4.6 (8) | 3 (3) | 6.7 (5) | 0.25 |
| **Biological values, median (IQR)** |  |  |  |  |
| Preoperative hemoglobin (g/dl) | 13.2 (12.2 - 14.4) | 13.3 (12 – 14.5) | 13.2 (12 – 14) | 0.53 |
| Preoperative glycemia (g/dl) | 5.3 (4.9 – 6.2) | 5.3 (4.9 – 6.2) | 5.3 (5 – 6) | 0.78 |
| Postoperative hemoglobin (g/dl) | 11.7 (10.5 –12.4) | 11.7 (10.5 – 12.6) | 11.7 (10.7 – 12.3) | 0.69 |
| Postoperative glycemia | 8.7 (7.7 – 10) | 8.4 (7.3 – 9.7) | 8.9 (8 – 10.2) | 0.054 |
| **Transfusion, % (n)** |  |  |  |  |
| PRBC | 35.3 (61) | 35.3 (35) | 35.1 (26) | 0.11 |
| Fresh-frozen plasma | 42.2 (73) | 44.4 (44) | 39.2 (29) | 0.49 |
| Platelets | 34.1 (59) | 36.4 (36) | 31.1 (23) | 0.49 |
| PCC | 21.4 (37) | 18.2 (18) | 25.7 (19) | 0.23 |
| Fibrinogen | 37.6 (65) | 39.2 (39) | 35.2 (29) | 0.58 |
| **Cognitive pathway** |  |  |  |  |
| Delirium, % (n) | 35.3 (61) | 22,2 (22) | 52.7 (39) | < 0.0001 |
| Duration of delirium (days), median (IQR) | 0 (0 – 2) | 0 (0 – 0) | 1 (0 – 3) | < 0.0001 |
| POCD, % (n) | 36.4 (63) | 29.3 (29) | 45.9  (34) | 0.02 |
| Preoperative MMSE, median (IQR) | 26 (23 – 28) | 26 (25 – 29) | 25 (23 – 27) | < 0.0001 |
| Postoperative MMSE, median (IQR) | 25 (22 – 28) | 26 (24 – 29) | 23 (20 – 26) | < 0.0001 |
| Loss of MMSE points, median (IQR) | 1 (-1 – 2) | 0 (-2 – 2) | 1 (-1 – 3) | 0.010 |

Data are expressed as n (%), or median (IQR, interquartile range)

BMI : body mass index ; Chronic renal failure : DFG < 50ml/min (Cockroft and Gault formule) ; CPB : Cardiopulmonary Bypass ; SAPS II : Simplified Acute Physiology Score 2 ; ICU : intensive care unit ; Acute renal failure : if presence of KDIGO criterias 1, 2 or 3 ; MMSE : Mini Mental State Examination ; PCC : Prothrombin Complex Concentrates; PRBC : Pack Red Blood Cell

Table S2*:* Cognitive pathway according to the postoperative delirium

| MMSE | Total (N = 173) | No delirium  Patients (N = 112) | p  (D1/D7 vs Preoperative) | Delirium  Patients (N = 61) | p  (D1/D7 vs Preoperative) | p  Delirium vs no delirium) |
| --- | --- | --- | --- | --- | --- | --- |
| Preoperative | 26 (23 – 28) | 26 (24 – 28) |  | 25 (23 – 27) |  | 0.003 |
| D1 after surgery | 24 (21 – 27) | 25 (23 – 28) | 0.01 * | 21 (20 – 24) | < 0.0001 * | < 0.0001 * |
| D7 after surgery | 25 (22 – 28) | 26.5 (24 – 28) | 0.465 | 23 (20-25) | < 0.0001 * | < 0.0001 * |

Values are median (IQR : interquantile range). This table shows the change in MMSE score according to the presence or absence of delirium. Mann-Whitney tests were performed to compare values.

** = p < 0,05*
